# Supplementary material
Source: PubMed Central journal article supplement (PMC5466494)
Supplement: NIHMS852779-supplement-supplement_1.pdf [file NIHMS852779-supplement-supplement_1.pdf]

Supplemental Table 1. Definitions of clinic and ambulatory blood pressure monitoring phenotypes.

| Phenotype                                             | Clinic BP Measurements                         | ABPM Measurements                                        |
|-------------------------------------------------------|------------------------------------------------|----------------------------------------------------------|
| <b>Phenotype determined using clinic BP only</b>      |                                                |                                                          |
| Clinic hypertension                                   | Mean SBP $\geq$ 140 mmHg or DBP $\geq$ 90 mmHg | N/A                                                      |
| <b>Phenotypes determined using ABPM only</b>          |                                                |                                                          |
| Daytime hypertension                                  | N/A                                            | Mean daytime SBP $\geq$ 135 mmHg or DBP $\geq$ 85 mmHg   |
| Nocturnal hypertension                                | N/A                                            | Mean nighttime SBP $\geq$ 120 mmHg or DBP $\geq$ 70 mmHg |
| 24-hour hypertension                                  | N/A                                            | Mean 24-hour hypertension $\geq$ 130/80 mmHg             |
| <b>Phenotypes determined using clinic BP and ABPM</b> |                                                |                                                          |
| Sustained hypertension                                | Mean SBP $\geq$ 140 mmHg or DBP $\geq$ 90 mmHg | Mean daytime SBP $\geq$ 135 mmHg or DBP $\geq$ 85 mmHg   |
| White coat hypertension <sup>†</sup>                  | Mean SBP $\geq$ 140 mmHg or DBP $\geq$ 90 mmHg | Mean daytime SBP < 135 mmHg and DBP < 85 mmHg            |
| Masked hypertension <sup>††</sup>                     | Mean SBP < 140 mmHg and DBP < 90 mmHg          | Mean daytime SBP $\geq$ 135 mmHg or DBP $\geq$ 85 mmHg   |

N/A – not applicable as the criterion is not used in determining the presence of a phenotype.

BP: blood pressure.

SBP: systolic blood pressure.

DBP: diastolic blood pressure.

ABPM: ambulatory blood pressure monitoring.

Non-dipping pattern was defined as a nocturnal decline in systolic blood pressure  $\leq$  10%

Nocturnal systolic blood pressure dipping ratio was dichotomized to  $\leq$  0.80, >0.80 to 0.90, >0.90 to 1.00, and >1.00.

<sup>†</sup> Analyses of white coat hypertension were restricted to participants with clinic hypertension (mean SBP  $\geq$  140 mmHg or DBP  $\geq$  90 mmHg).

<sup>††</sup> Analyses of masked hypertension were restricted to participants without clinic hypertension (mean SBP < 140 mmHg and DBP < 90 mmHg).

Supplemental Table 2. Mean clinic, daytime, nighttime, and 24-hour systolic blood pressure (top panel) and diastolic blood pressure (bottom panel) among participants not taking and taking antihypertensive medication.

|                             | Systolic blood pressure, mm Hg         |              |              |              |                                    |              |              |              |
|-----------------------------|----------------------------------------|--------------|--------------|--------------|------------------------------------|--------------|--------------|--------------|
|                             | Not taking antihypertensive medication |              |              |              | Taking antihypertensive medication |              |              |              |
|                             | Clinic                                 | Daytime      | Nighttime    | 24-hour      | Clinic                             | Daytime      | Nighttime    | 24-hour      |
| Overall                     | 124.5 (15.7)                           | 127.1 (12.8) | 117.1 (14.0) | 123.3 (12.7) | 130.0 (15.6)                       | 131.2 (13.6) | 123.9 (16.2) | 128.6 (13.9) |
| Age group, years            |                                        |              |              |              |                                    |              |              |              |
| <45                         | 117.8 (13.2)                           | 121.5 (10.3) | 110.3 (10.2) | 117.1 (9.8)  | 124.8 (8.9)                        | 129.9 (13.1) | 119.4 (12.2) | 126.0 (12.3) |
| 45-64                       | 124.0 (15.0)                           | 126.8 (12.6) | 117.1 (14.2) | 123.2 (12.7) | 129.1 (15.2)                       | 129.9 (13.4) | 122.0 (15.8) | 127.1 (13.6) |
| ≥ 65                        | 132.5 (16.4)                           | 133.2 (13.0) | 123.9 (13.6) | 129.5 (12.5) | 131.9 (16.6)                       | 133.1 (13.8) | 127.0 (16.7) | 130.8 (14.1) |
| Male                        | 126.8 (16.8)                           | 129.1 (12.2) | 118.2 (12.9) | 125.1 (11.9) | 131.0 (17.1)                       | 134.3 (13.9) | 127.5 (15.6) | 131.8 (14.0) |
| Female                      | 123.2 (14.9)                           | 125.9 (12.9) | 116.5 (14.6) | 122.2 (13.1) | 129.6 (15.0)                       | 130.0 (13.3) | 122.4 (16.2) | 127.3 (13.6) |
| Clinic blood pressure, mmHg |                                        |              |              |              |                                    |              |              |              |
| SBP/DBP < 120/80            | 110.6 (6.5)                            | 119.7 (8.8)  | 110.0 (10.9) | 115.9 (9.1)  | 112.1 (5.7)                        | 124.4 (11.7) | 116.3 (14.5) | 121.5 (12.1) |
| SBP/DBP 120-139/80-89       | 127.3 (6.1)                            | 128.9 (10.9) | 118.9 (12.3) | 125.0 (10.8) | 129.2 (6.0)                        | 130.5 (12.3) | 122.8 (14.9) | 127.6 (12.2) |
| SBP/DBP ≥ 140/90            | 151.3 (15.5)                           | 139.9 (14.7) | 129.9 (15.8) | 136.4 (14.2) | 151.6 (10.4)                       | 140.4 (13.5) | 134.6 (15.3) | 138.7 (12.6) |
|                             | Diastolic blood pressure, mm Hg        |              |              |              |                                    |              |              |              |
|                             | Not taking antihypertensive medication |              |              |              | Taking antihypertensive medication |              |              |              |
|                             | Clinic                                 | Daytime      | Nighttime    | 24-hour      | Clinic                             | Daytime      | Nighttime    | 24-hour      |
| Overall                     | 74.6 (8.4)                             | 78.2 (8.9)   | 67.7 (9.2)   | 74.1 (8.5)   | 74.3 (8.5)                         | 77.6 (9.4)   | 68.8 (10.1)  | 74.1 (9.1)   |
| Age group, years            |                                        |              |              |              |                                    |              |              |              |
| <45                         | 76.3 (8.4)                             | 78.3 (7.9)   | 65.3 (8.4)   | 73.2 (7.7)   | 77.4 (8.3)                         | 83.4 (10.7)  | 72.2 (10.5)  | 79.0 (10.4)  |
| 45-64                       | 74.9 (8.5)                             | 78.9 (9.0)   | 68.7 (9.3)   | 75.0 (8.6)   | 75.8 (8.5)                         | 78.9 (9.1)   | 69.3 (10.0)  | 75.2 (8.7)   |
| ≥ 65                        | 72.1 (7.8)                             | 76.3 (9.5)   | 67.5 (9.3)   | 72.6 (8.9)   | 71.7 (7.9)                         | 75.0 (8.9)   | 67.6 (10.0)  | 72.0 (8.8)   |
| Male                        | 76.5 (9.0)                             | 81.4 (8.6)   | 70.4 (8.7)   | 77.2 (8.0)   | 75.4 (8.8)                         | 81.6 (9.4)   | 74.3 (10.2)  | 78.9 (9.2)   |
| Female                      | 73.5 (7.9)                             | 76.4 (8.6)   | 66.2 (9.1)   | 72.3 (8.3)   | 73.8 (8.4)                         | 76.0 (9.0)   | 66.7 (9.2)   | 72.3 (8.3)   |
| Clinic blood pressure, mmHg |                                        |              |              |              |                                    |              |              |              |
| SBP/DBP < 120/80            | 69.6 (6.2)                             | 74.8 (6.9)   | 64.1 (7.4)   | 70.6 (6.5)   | 67.8 (6.5)                         | 74.8 (8.7)   | 65.8 (9.4)   | 71.4 (8.3)   |
| SBP/DBP 120-139/80-89       | 75.9 (6.8)                             | 79.3 (8.6)   | 69.0 (8.8)   | 75.2 (8.0)   | 75.3 (7.1)                         | 78.1 (9.3)   | 68.8 (10.0)  | 74.3 (8.9)   |
| SBP/DBP ≥ 140/90            | 82.9 (10.1)                            | 83.4 (11.2)  | 72.8 (11.2)  | 79.4 (10.8)  | 79.3 (9.1)                         | 79.4 (9.8)   | 72.3 (9.9)   | 76.8 (9.3)   |

Numbers in table are mean (standard deviation).

SBP: Systolic blood pressure.

DBP: Diastolic blood pressure.

Supplemental Table 3. Systolic and diastolic white coat effects among participants with systolic/diastolic blood pressure  $\geq 140/90$  mm Hg not taking (left panel) and taking (right panel) antihypertensive medication.

|                  | Systolic blood pressure, mmHg          |                      |                           |         |                                    |                      |                           |         |
|------------------|----------------------------------------|----------------------|---------------------------|---------|------------------------------------|----------------------|---------------------------|---------|
|                  | Not taking antihypertensive medication |                      |                           |         | Taking antihypertensive medication |                      |                           |         |
|                  | Mean (SD)<br>Clinic                    | Mean (SD)<br>Daytime | White coat<br>effect (SD) | p-value | Mean (SD)<br>Clinic                | Mean (SD)<br>Daytime | White coat<br>effect (SD) | p-value |
| Overall          | 151.3 (15.5)                           | 139.9 (14.7)         | 11.4 (19.7)               | <0.001  | 151.6 (10.4)                       | 140.4 (13.5)         | 11.2 (15.1)               | <0.001  |
| Age group, years |                                        |                      |                           |         |                                    |                      |                           |         |
| <45              | 147.7 (15.8)                           | 137.4 (10.6)         | 10.3 (15.0)               | 0.121   | N/A                                | N/A                  | N/A                       | N/A     |
| 45-64            | 150.0 (13.7)                           | 139.8 (16.1)         | 10.2 (15.7)               | 0.001   | 151.2 (10.1)                       | 137.6 (13.3)         | 13.6 (15.8)               | <0.001  |
| $\geq 65$        | 154.7 (18.1)                           | 140.9 (13.9)         | 13.8 (26.6)               | 0.028   | 152.2 (10.7)                       | 142.7 (13.1)         | 9.4 (13.6)                | <0.001  |
| P-interaction    |                                        |                      |                           | 0.562   |                                    |                      |                           | 0.358   |
| Male             | 152.8 (17.9)                           | 141.4 (13.6)         | 11.4 (25.1)               | 0.019   | 152.7 (12.7)                       | 141.4 (14.3)         | 11.2 (15.3)               | <0.001  |
| Female           | 149.9 (13.0)                           | 138.5 (15.7)         | 11.4 (13.5)               | <0.001  | 151.0 (9.1)                        | 139.8 (13.1)         | 11.3 (15.0)               | <0.001  |
| P-interaction    |                                        |                      |                           | 0.991   |                                    |                      |                           | 0.969   |
|                  | Diastolic blood pressure, mmHg         |                      |                           |         |                                    |                      |                           |         |
|                  | Not taking antihypertensive medication |                      |                           |         | Taking antihypertensive medication |                      |                           |         |
|                  | Mean (SD)<br>Clinic                    | Mean (SD)<br>Daytime | White coat<br>effect (SD) | p-value | Mean (SD)<br>Clinic                | Mean (SD)<br>Daytime | White coat<br>effect (SD) | p-value |
| Overall          | 82.9 (10.1)                            | 83.4 (11.2)          | -0.5 (12.1)               | 0.770   | 79.3 (9.1)                         | 79.4 (9.8)           | -0.1 (10.0)               | 0.899   |
| Age group, years |                                        |                      |                           |         |                                    |                      |                           |         |
| <45              | 93.3 (3.4)                             | 86.6 (6.6)           | 6.7 (7.7)                 | 0.059   | N/A                                | N/A                  | N/A                       | N/A     |
| 45-64            | 85.4 (7.9)                             | 85.9 (10.4)          | -0.5 (10.6)               | 0.769   | 83.6 (7.5)                         | 82.0 (9.3)           | 1.6 (10.7)                | 0.235   |
| $\geq 65$        | 75.4 (9.9)                             | 78.1 (12.3)          | -2.7 (15.0)               | 0.419   | 75.0 (8.6)                         | 76.7 (9.5)           | -1.7 (9.2)                | 0.142   |
| P-interaction    |                                        |                      |                           | 0.108   |                                    |                      |                           | 0.099   |
| Male             | 86.0 (9.2)                             | 87.6 (10.1)          | -1.6 (14.5)               | 0.560   | 81.7 (10.1)                        | 82.4 (8.9)           | -0.7 (9.5)                | 0.619   |
| Female           | 80.1 (10.2)                            | 79.6 (11.0)          | 0.6 (9.7)                 | 0.743   | 78.1 (8.5)                         | 78.0 (10.0)          | 0.2 (10.3)                | 0.865   |
| P-interaction    |                                        |                      |                           | 0.494   |                                    |                      |                           | 0.628   |

SD: standard deviation.

White-coat effect calculated for participants (n=196) with clinic systolic blood pressure/diastolic blood pressure  $\geq 140/90$  mmHg.

There was only one participant taking antihypertensive medication under 45 years of age.

P-interaction assessed trends in the white coat effect across age and differences in the white coat effect by sex.

Supplemental Table 4. Systolic and diastolic masked effects among participants with systolic/diastolic blood pressure < 140/90 mm Hg not taking (left panel) and taking (right panel) antihypertensive medication.

|                  | Systolic blood pressure, mmHg          |                      |                  |         |                                    |                      |                  |         |
|------------------|----------------------------------------|----------------------|------------------|---------|------------------------------------|----------------------|------------------|---------|
|                  | Not taking antihypertensive medication |                      |                  |         | Taking antihypertensive medication |                      |                  |         |
|                  | Mean (SD)<br>Clinic                    | Mean (SD)<br>Daytime | Masked<br>effect | p-value | Mean (SD)<br>Clinic                | Mean (SD)<br>Daytime | Masked<br>effect | p-value |
| Overall          | 120.0 (10.4)                           | 124.9 (11.1)         | 4.9 (10.5)       | <0.001  | 123.5 (10.0)                       | 128.4 (12.4)         | 5.0 (13.8)       | <0.001  |
| Age group, years |                                        |                      |                  |         |                                    |                      |                  |         |
| <45              | 115.4 (9.5)                            | 120.2 (9.1)          | 4.8 (9.5)        | <0.001  | 124.4 (8.7)                        | 128.9 (11.8)         | 4.5 (12.0)       | 0.044   |
| 45-64            | 119.8 (10.3)                           | 124.7 (10.5)         | 4.9 (10.5)       | <0.001  | 123.2 (10.1)                       | 127.9 (12.7)         | 4.7 (14.1)       | <0.001  |
| ≥ 65             | 126.2 (8.7)                            | 130.9 (11.9)         | 4.8 (11.8)       | 0.001   | 123.6 (10.2)                       | 129.1 (12.1)         | 5.5 (13.6)       | <0.001  |
| P-interaction    |                                        |                      |                  | 0.972   |                                    |                      |                  | 0.546   |
| Male             | 120.9 (9.3)                            | 126.3 (10.0)         | 5.4 (10.2)       | <0.001  | 122.8 (9.8)                        | 131.6 (12.8)         | 8.8 (13.4)       | <0.001  |
| Female           | 119.6 (10.9)                           | 124.2 (11.5)         | 4.6 (10.7)       | <0.001  | 123.7 (10.1)                       | 127.3 (12.1)         | 3.6 (13.6)       | <0.001  |
| P-interaction    |                                        |                      |                  | 0.489   |                                    |                      |                  | <0.001  |
|                  | Diastolic blood pressure, mmHg         |                      |                  |         |                                    |                      |                  |         |
|                  | Not taking antihypertensive medication |                      |                  |         | Taking antihypertensive medication |                      |                  |         |
|                  | Mean (SD)<br>Clinic                    | Mean (SD)<br>Daytime | Masked<br>effect | p-value | Mean (SD)<br>Clinic                | Mean (SD)<br>Daytime | Masked<br>effect | p-value |
| Overall          | 73.2 (7.3)                             | 77.4 (8.2)           | 4.2 (9.1)        | <0.001  | 72.8 (7.7)                         | 77.0 (9.2)           | 4.3 (9.7)        | <0.001  |
| Age group, years |                                        |                      |                  |         |                                    |                      |                  |         |
| <45              | 74.9 (7.1)                             | 77.6 (7.7)           | 2.7 (6.9)        | <0.001  | 77.0 (8.1)                         | 83.0 (10.6)          | 6.0 (11.2)       | 0.005   |
| 45-64            | 73.2 (7.3)                             | 77.8 (8.3)           | 4.6 (9.7)        | <0.001  | 73.8 (7.6)                         | 78.1 (8.8)           | 4.3 (9.9)        | <0.001  |
| ≥ 65             | 71.2 (6.8)                             | 75.8 (8.5)           | 4.6 (9.3)        | <0.001  | 70.4 (7.2)                         | 74.2 (8.6)           | 3.8 (9.2)        | <0.001  |
| P-interaction    |                                        |                      |                  | 0.167   |                                    |                      |                  | 0.297   |
| Male             | 74.3 (7.5)                             | 80.0 (7.6)           | 5.8 (9.8)        | <0.001  | 73.0 (7.0)                         | 81.3 (9.6)           | 8.3 (9.9)        | <0.001  |
| Female           | 72.6 (7.1)                             | 75.9 (8.2)           | 3.3 (8.6)        | <0.001  | 72.7 (8.0)                         | 75.5 (8.6)           | 2.8 (9.3)        | <0.001  |
| P-interaction    |                                        |                      |                  | 0.012   |                                    |                      |                  | <0.001  |

SD: standard deviation.

Masked effect calculated for participants (n=820) with clinic systolic blood pressure/diastolic blood pressure < 140/90 mmHg.

P-interaction assessed trends in the masked effect across age and differences in the masked effect by sex.

Supplemental Table 5. Prevalence of non-dipping blood pressure and dipping ratio categories for participant not taking antihypertensive medication (top panel) and taking antihypertensive medication (bottom panel).

|                                        | Dipping          |                  | Dipping ratio categories |                  |                  |                  |
|----------------------------------------|------------------|------------------|--------------------------|------------------|------------------|------------------|
|                                        | No               | Yes              | ≤0.80                    | >0.80 to 0.90    | >0.90 to 1.00    | >1.00            |
| Not taking antihypertensive medication |                  |                  |                          |                  |                  |                  |
| Overall                                | 62.4 (57.7-66.9) | 37.6 (33.1-42.4) | 3.0 (1.6-5.0)            | 34.7 (30.3-39.3) | 51.9 (47.2-56.7) | 10.4 (7.7-13.7)  |
| Age groups, years                      |                  |                  |                          |                  |                  |                  |
| <45                                    | 55.9 (45.2-66.2) | 44.1 (33.8-54.8) | 1.1 (0.0-5.9)            | 43.0 (32.8-53.7) | 49.5 (38.9-60.0) | 6.5 (2.4-13.5)   |
| 45-64                                  | 64.8 (58.6-70.7) | 35.2 (29.3-41.4) | 4.0 (1.9-7.2)            | 31.2 (25.6-37.3) | 53.8 (47.4-60.0) | 11.1 (7.5-15.6)  |
| ≥ 65                                   | 62.1 (51.6-71.9) | 37.9 (28.1-48.4) | 2.1 (0.3-7.4)            | 35.8 (26.2-46.3) | 49.5 (39.1-59.9) | 12.6 (6.7-21.0)  |
| Male                                   | 62.4 (54.4-69.8) | 37.7 (30.2-45.6) | 3.7 (1.4-7.9)            | 34.0 (26.7-41.8) | 56.2 (48.2-64.0) | 6.2 (3.0-11.1)   |
| Female                                 | 62.4 (56.4-68.1) | 37.6 (31.9-43.6) | 2.5 (1.0-5.1)            | 35.1 (29.5-41.0) | 49.5 (43.5-55.5) | 12.9 (9.2-17.4)  |
| Clinic BP, mmHg                        |                  |                  |                          |                  |                  |                  |
| SBP/DBP < 120/80                       | 61.6 (53.7-69.1) | 38.4 (30.9-46.3) | 3.1 (1.0-7.0)            | 35.4 (28.1-43.2) | 52.4 (44.5-60.3) | 9.2 (5.2-14.6)   |
| SBP/DBP 120-139/80-89                  | 62.2 (55.3-68.7) | 37.9 (31.3-44.7) | 2.8 (1.0-6.0)            | 35.1 (28.7-41.9) | 50.9 (44.0-57.8) | 11.2 (7.3-16.2)  |
| SBP/DBP ≥ 140/90                       | 65.1 (52.0-76.7) | 34.9 (23.3-48.0) | 3.2 (0.4-11.0)           | 31.8 (20.6-44.7) | 54.0 (40.9-66.6) | 11.1 (4.6-21.6)  |
| Taking antihypertensive medication     |                  |                  |                          |                  |                  |                  |
| Overall                                | 69.6 (65.6-73.3) | 30.4 (26.7-34.4) | 4.7 (3.1-6.8)            | 25.7 (22.2-29.5) | 45.7 (41.6-49.9) | 23.8 (20.4-27.5) |
| Age groups, %                          |                  |                  |                          |                  |                  |                  |
| <45 years                              | 60.6 (42.1-77.1) | 39.4 (22.9-57.9) | 3.0 (0.1-15.8)           | 36.4 (20.4-54.9) | 45.5 (28.1-63.7) | 15.2 (5.1-31.9)  |
| 45-64 years                            | 66.8 (61.2-72.0) | 33.2 (28.0-38.8) | 4.5 (2.5-7.5)            | 28.7 (23.7-34.1) | 44.8 (39.2-50.6) | 21.9 (17.5-27.0) |
| ≥ 65 years                             | 74.6 (68.5-80.0) | 25.4 (20.0-31.5) | 5.2 (2.7-8.9)            | 20.3 (15.3-26.0) | 47.0 (40.4-53.6) | 27.6 (21.9-33.8) |
| Male                                   | 73.9 (66.4-80.5) | 26.1 (26.1-73.9) | 2.5 (0.7-6.2)            | 23.6 (17.3-30.9) | 50.3 (42.3-58.3) | 23.6 (17.3-30.9) |
| Female                                 | 67.9 (63.1-72.4) | 32.1 (27.7-36.9) | 5.6 (3.6-8.2)            | 26.6 (22.4-31.1) | 44.0 (39.1-48.9) | 23.9 (19.9-28.3) |
| Clinic BP, mmHg                        |                  |                  |                          |                  |                  |                  |
| SBP/DBP < 120/80                       | 65.1 (56.9-72.7) | 34.9 (27.3-43.1) | 4.7 (1.9-9.4)            | 30.2 (23.0-38.3) | 44.3 (36.2-52.7) | 20.8 (14.6-28.2) |
| SBP/DBP 120-139/80-89                  | 68.3 (62.6-73.6) | 31.7 (26.5-37.4) | 5.8 (3.4-9.1)            | 25.9 (21.0-31.4) | 44.4 (38.6-50.3) | 23.9 (19.1-29.2) |
| SBP/DBP ≥ 140/90                       | 77.4 (69.4-84.2) | 22.6 (15.8-30.6) | 2.3 (0.5-6.5)            | 20.3 (15.8-30.6) | 50.4 (41.6-59.2) | 27.1 (19.7-35.5) |

Numbers in table are percentage (95% confidence interval).

Dipping blood pressure defined as a decline in SBP from daytime to nighttime > 10%.

BP: blood pressure; SBP: systolic blood pressure; DBP: diastolic blood pressure.

The prevalence of dipping ratio categories ≤0.80 and >0.80 to 0.90 may not sum to the dipping category and the prevalence of dipping ratio categories >0.90 to 1.00 and >1.00 may not sum to the no dipping category due to rounding.
